# Supplementary material for: Adherence to Technology-Mediated Insomnia Treatment: A Meta-Analysis, Interviews, and Focus Groups
Source: PubMed Central journal article supplement (PMC4642391; doi:10.2196/jmir.4115), 2015-09-04
Supplement: jmir_v17i9e214_app1.pdf [file jmir_v17i9e214_app1.pdf]

## **1. Studies included in the meta-analysis**

| <b>Authors</b>              | <b>Year</b> | <b>Title</b>                                                                                                       |
|-----------------------------|-------------|--------------------------------------------------------------------------------------------------------------------|
| Oosterhuis and Klip         | 1997        | The treatment of insomnia through mass media, the results of a televised behavioural training programme            |
| Rybarczyk et al.            | 2002        | Efficacy of two behavioral treatment programs for comorbid geriatric insomnia                                      |
| Ström, Petterson, Andersson | 2004        | Internet-based treatment for insomnia: a controlled evaluation                                                     |
| Suzuki et al.               | 2008        | Evaluation of an internet-based self-help program for better quality of sleep among Japanese workers: a            |
| Ritterband et al.           | 2009        | Efficacy of an Internet-based behavioral intervention for adults with insomnia                                     |
| Van Straten et al.          | 2009        | Self-help treatment for insomnia through television and book: a randomized trial                                   |
| Vincent and Lewycky         | 2009        | Logging on for better sleep: RCT of the effectiveness of online treatment for insomnia                             |
| Riley, Mihm, Behar, Morin   | 2010        | A computer device to deliver behavioural interventions for insomnia                                                |
| Lancee et al.               | 2011        | Internet-delivered or mailed self-help treatment for insomnia? A randomized waiting-list controlled trial          |
| Ritterband et al.           | 2011        | Initial evaluation of an internet intervention to improve the sleep of cancer survivors with insomnia              |
| Espie et al.                | 2012        | A randomized, placebo-controlled trial of online cognitive behavioural therapy for insomnia disorder delivered via |
| Haimov and Shatil           | 2013        | Cognitive Training Improves Sleep Quality and Cognitive Function among Older Adults with Insomnia                  |
| Lancee et al.               | 2013        | Baseline depression levels do not affect efficacy of cognitive-behavioral self-help treatment for insomnia         |
| Lancee et al.               | 2013        | Motivational support provided via email improves the effectiveness of internet-delivered self-help treatment for   |
| Lawson et al.               | 2013        | Validating a mobile phone application for the everyday, unobtrusive, objective measurement of sleep                |
| Van Straten et al.          | 2013        | Guided Internet-delivered cognitive behavioural treatment for insomnia: a randomized trial                         |
| Holmqvist, Vincent, Walsh   | 2014        | Web- vs telehealth-based delivery of cognitive behavioral therapy for insomnia: a randomized controlled trial      |
| Lipschitz, Landward,        | 2014        | An exploratory study of an online mind-body program for poor sleepers in a community sample                        |

Not included because of a lack of data:

| <b>Authors</b>  | <b>Year</b> | <b>Title</b>                                                                                           |
|-----------------|-------------|--------------------------------------------------------------------------------------------------------|
| Morawetz et al. | 1989        | Behavioral self-help treatment for insomnia: A controlled evaluation                                   |
| Riedel et al.   | 1995        | Sleep compression and sleep education for older insomniacs: Self-help versus therapist guidance        |
| Chen et al.     | 2013        | Enhancing adherence to cognitive behavioral therapy for insomnia through machine and social persuasion |
