# Supplementary material for: Adherence to Technology-Mediated Insomnia Treatment: A Meta-Analysis, Interviews, and Focus Groups
Source: PubMed Central journal article supplement (PMC4642391; doi:10.2196/jmir.4115), 2015-09-04
Supplement: jmir_v17i9e214_app6.pdf [file jmir_v17i9e214_app6.pdf]

# 1. Results of meta-analysis

## Experimental compliance post questionnaires

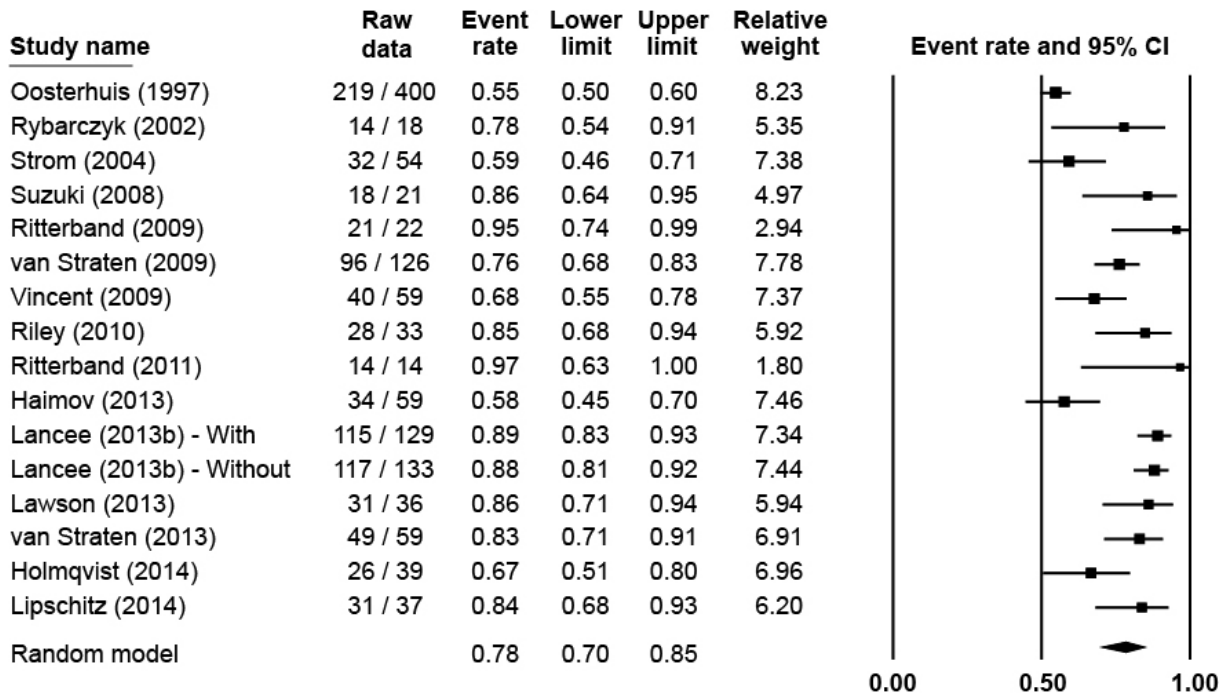

Heterogeneity:  $Q_{15} = 114.84$ ,  $P < .001$ ,  $I^2 = 86.94$ , indicates substantial heterogeneity in the data, which supports the choice for a random-effects model.

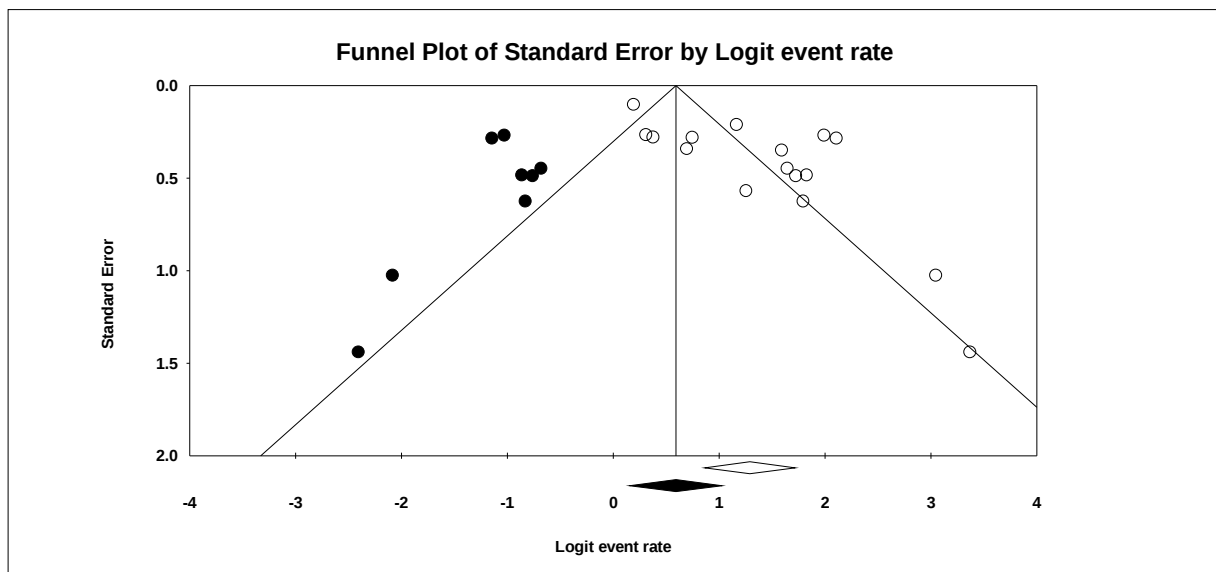

White dots indicate observed studies. The black dots indicate imputed data.

Publication bias: The funnel plot is noticeably asymmetric, with a majority of the smaller studies clustering to the right of the mean. This impression is confirmed by Egger's test ( $P = .002$ , two-tailed).

# Experimental compliance post diaries

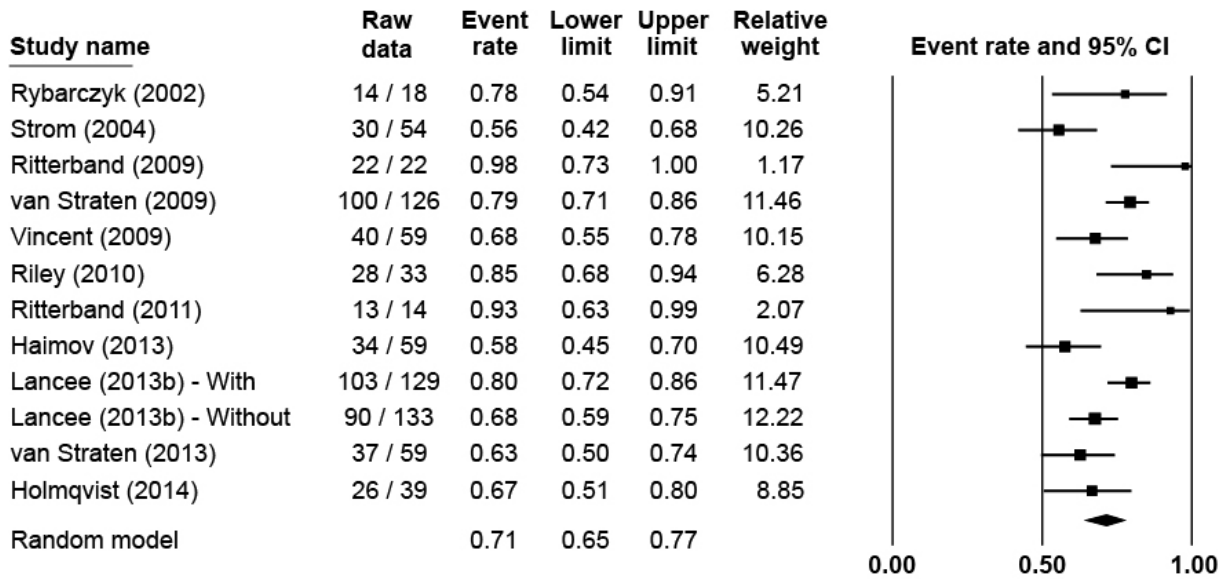

Heterogeneity:  $Q_{11} = 33.26$ ,  $P < .001$ ,  $I^2 = 66.92$ , suggests that the data is heterogeneous and supports the choice for a random-effect model.

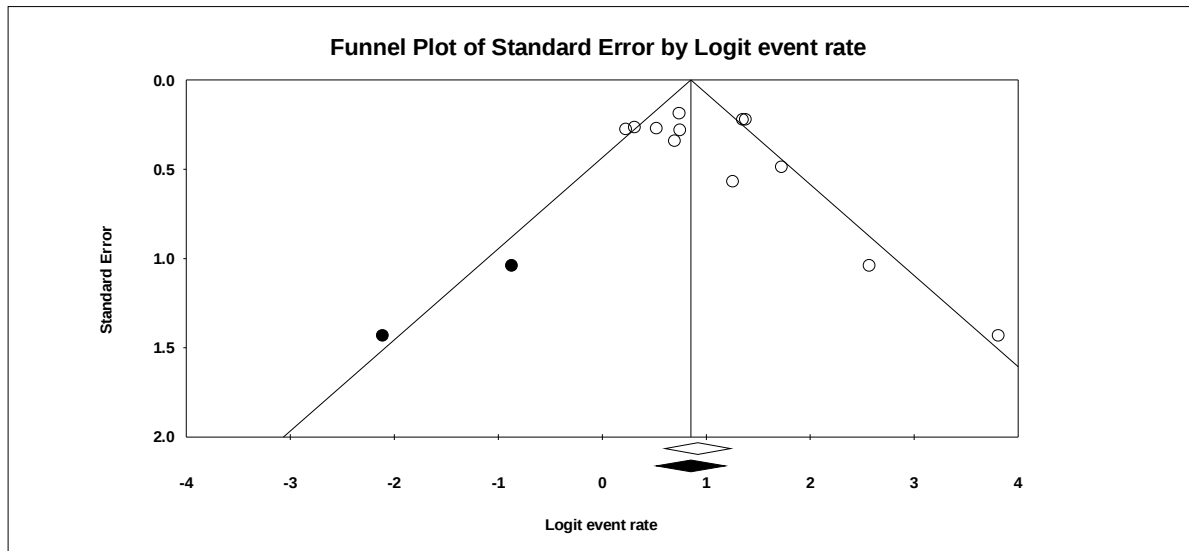

*White dots indicate observed studies. The black dots indicate imputed data.*

Publication bias: The shape of the funnel plot does not suggest significant publication bias, which is confirmed by Egger's test statistic,  $P = 0.21$

# Experimental compliance follow-up questionnaires

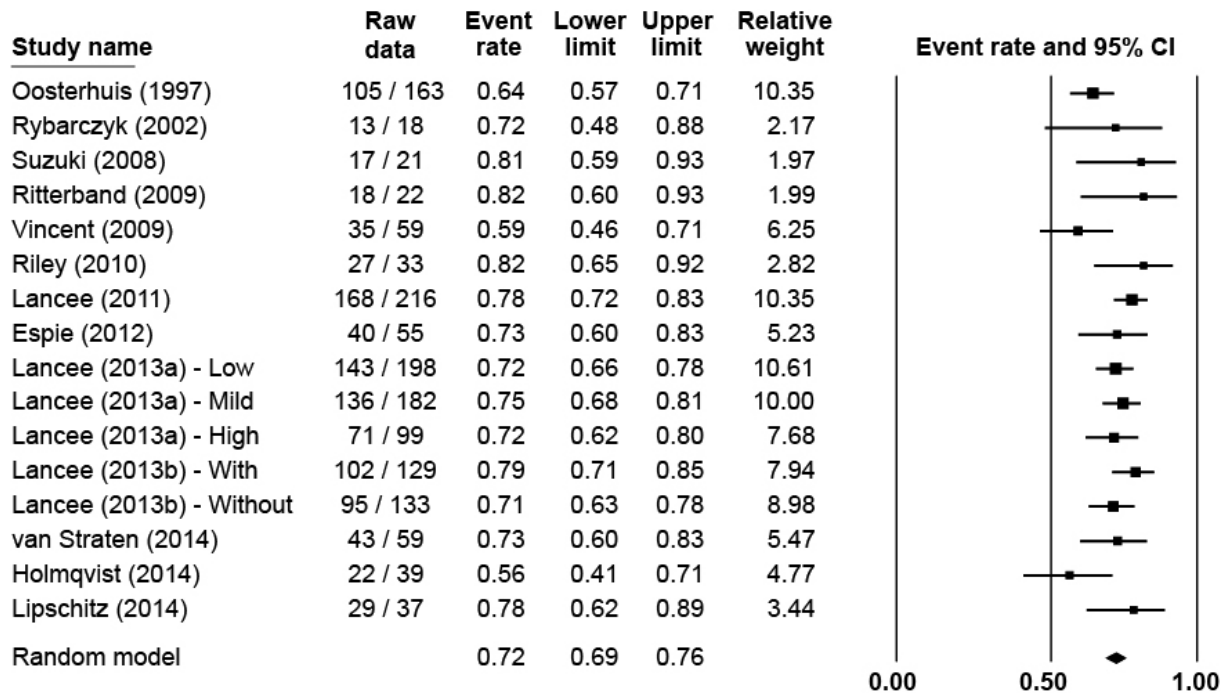

Heterogeneity:  $Q_{15} = 25.16$ ,  $P = .048$ ,  $I^2 = 40.39$ , indicates heterogeneity, which support the choice for a random-effects model.

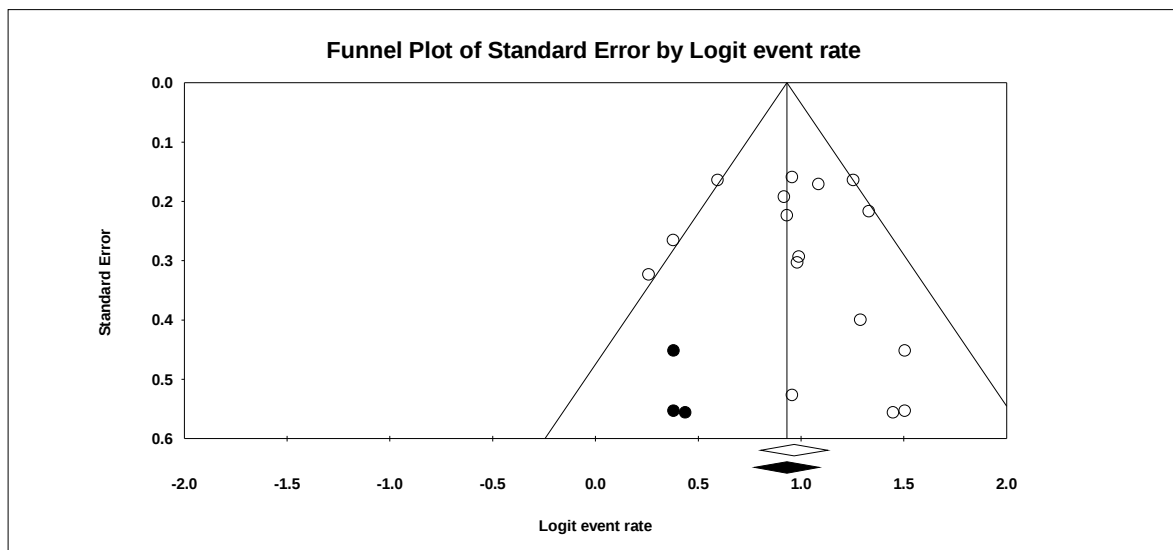

*White dots indicate observed studies. The black dots indicate imputed data.*

Publication bias: The shape of the funnel plot in did not reveal any indication of funnel plot asymmetry. This visual impression was also confirmed by Egger's test with  $P = 0.61$ , two-tailed.

# Experimental compliance follow-up diaries

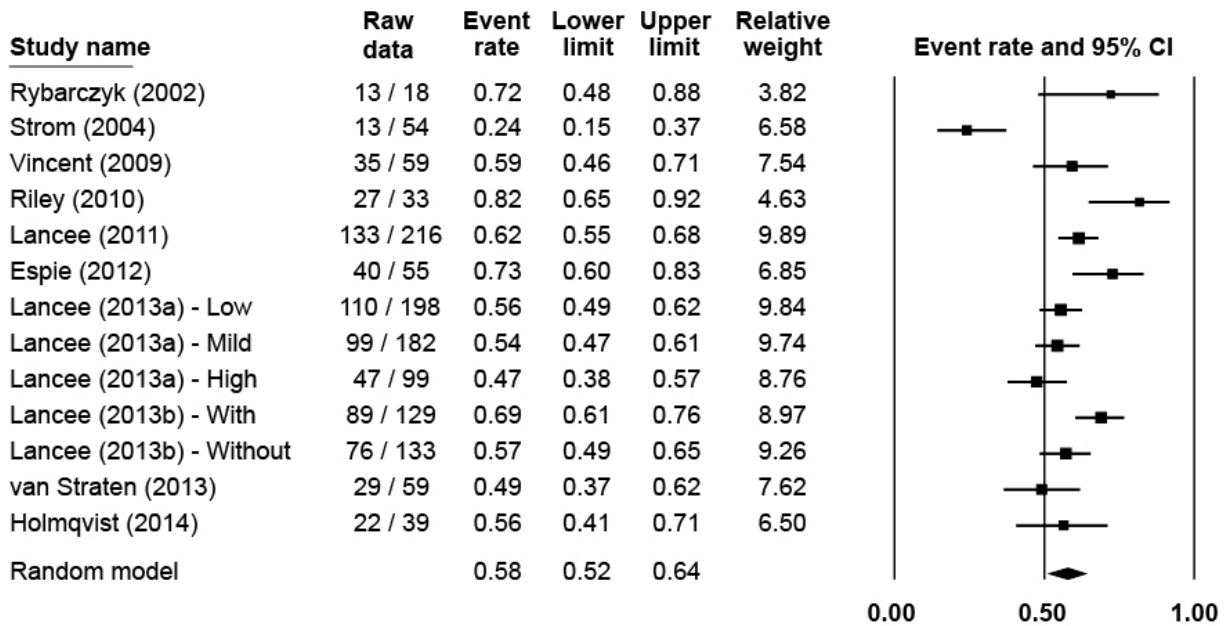

Heterogeneity:  $Q_{12} = 49.54$ ,  $P < .001$ ,  $I^2 = 75.77$ , indicates substantial heterogeneity and supports the choice for a random-effects model.

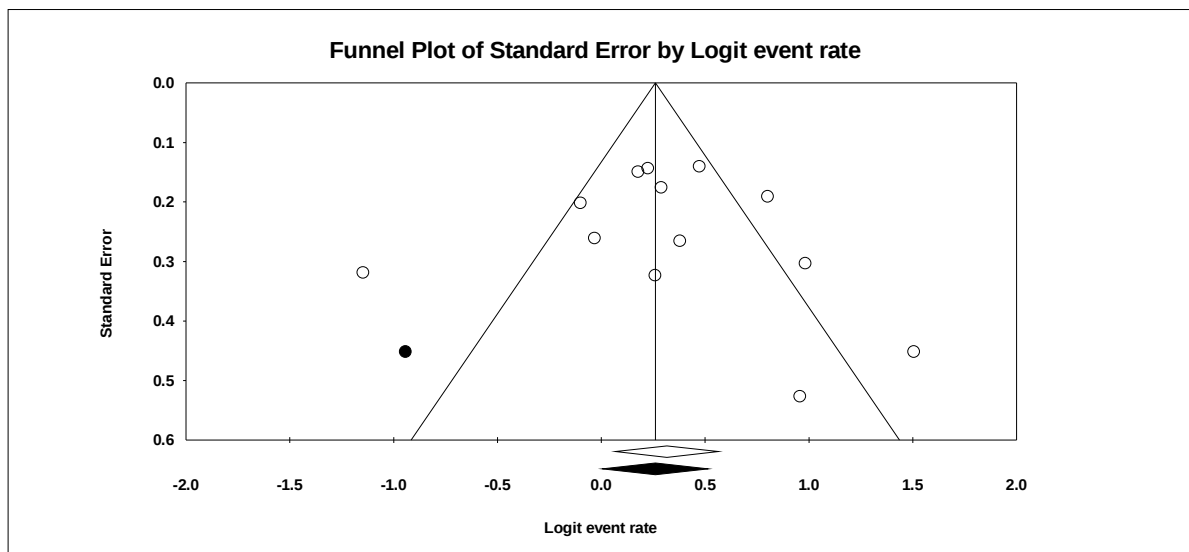

*White dots indicate observed studies. The black dots indicate imputed data.*

Publication bias: The shape of the funnel plot in did not reveal asymmetry. This visual impression was also confirmed by Egger's test with  $P = 0.75$ , two-tailed.

# Logged treatment adherence

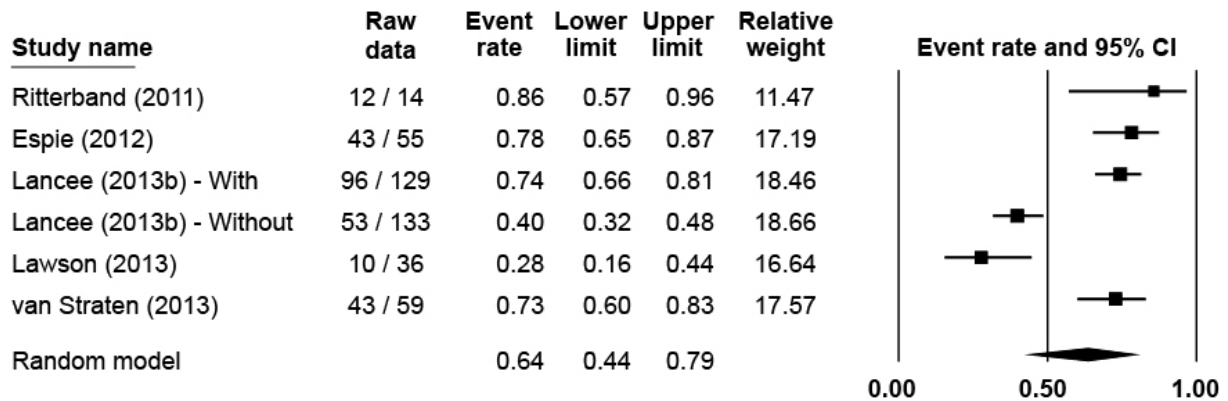

Heterogeneity:  $Q_5 = 59.76$ ,  $P < .001$ ,  $I^2 = 91.63$ , indicates that the data is heterogeneous, which supports the choice for a random-effects model.

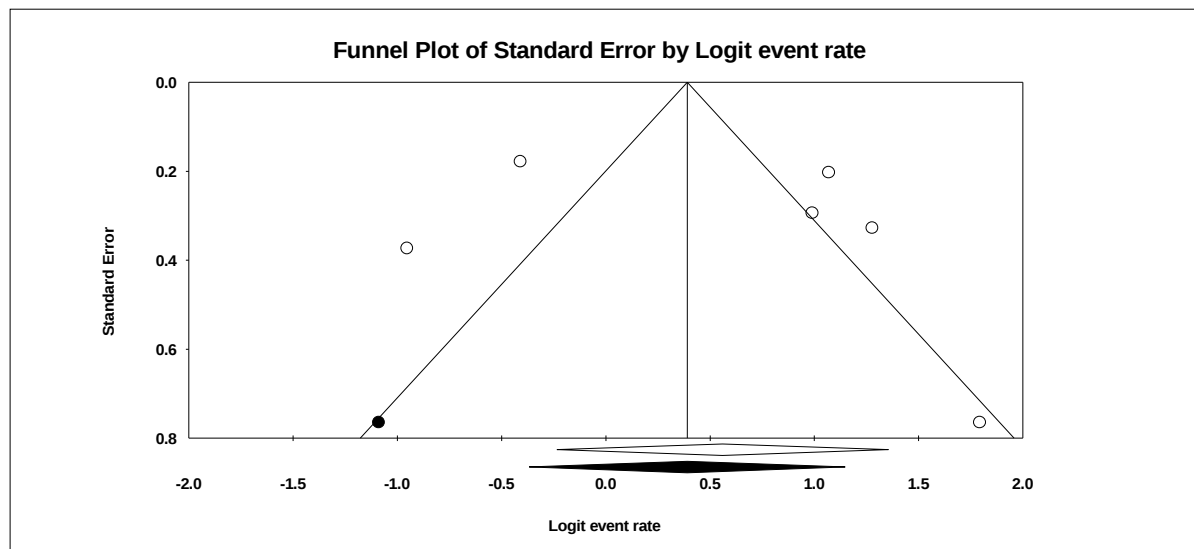

*White dots indicate observed studies. The black dots indicate imputed data.*

Publication bias: The shape of the funnel plot in did not reveal asymmetry. This visual impression was also confirmed by Egger's test with  $P = 0.59$ , two-tailed.

# Self-reported treatment adherence

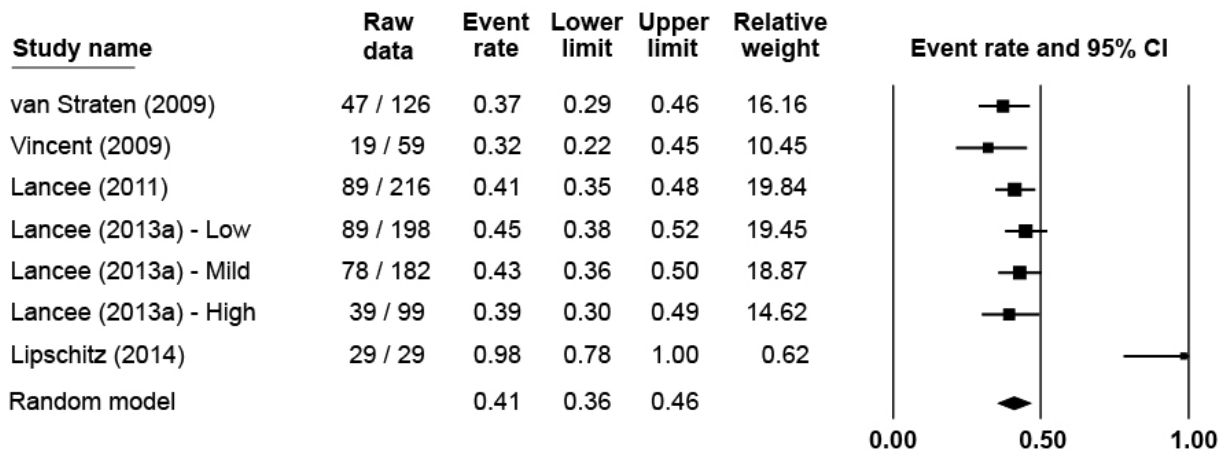

Heterogeneity:  $Q_5 = 13.88$ ,  $P = .031$ ,  $I^2 = 56.77$ , indicates heterogeneity and supports the choice for a random-effects model.

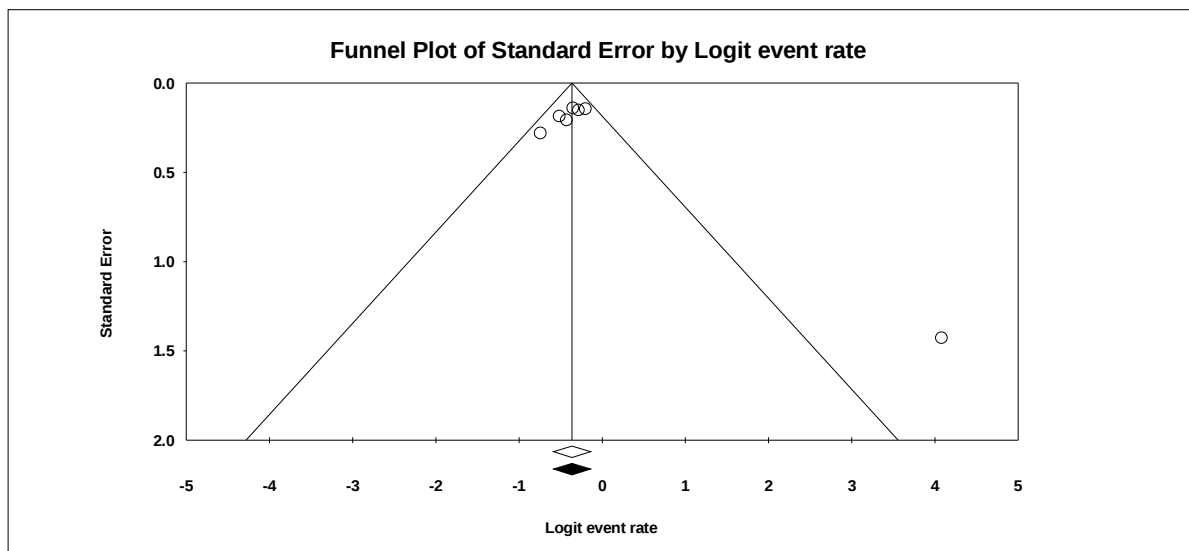

*White dots indicate observed studies. The black dots indicate imputed data.*

Publication bias: The shape of the funnel plot in did not reveal asymmetry. This visual impression was also confirmed by Egger's test with  $P = 0.29$ , two-tailed.
